# Supplementary material for: Detection of Lung Cancer via Blood Plasma and 1H-NMR Metabolomics: Validation by a Semi-Targeted and Quantitative Approach Using a Protein-Binding Competitor
Source: MDPI journal article supplement (doi:10.3390/metabo11080537), 2021-08-12
Supplement: s1 [file s1]

**Table S1.** Overview of the 237 integration numbers (variables) and their corresponding integration regions and contributing metabolites. All integration regions and corresponding metabolites are defined by spiking experiments. FAC: fatty acid chain; NAG: N-acetylated glycoproteins; NI: non-identified; PC: phosphatidylcholine; PL: phospholipids; SM: sphingomyelin; TG: triglycerides; VAR: variable (assigned integration number).

| Assigned integration number (variable) | Integration region (ppm) | Corresponding metabolite(s)                    |
|----------------------------------------|--------------------------|------------------------------------------------|
| VAR 001                                | 8.460 - 8.484            | Formate                                        |
| VAR 002                                | 8.190 - 8.240            | Hypoxanthine                                   |
| VAR 003                                | 7.945 - 8.170            | NI 1                                           |
| VAR 004                                | 7.905 - 7.945            | 1-methylhistidine                              |
| VAR 005                                | 7.875 - 7.905            | Uridine                                        |
| VAR 006                                | 7.845 - 7.875            | Histidine                                      |
| VAR 007                                | 7.820 - 7.845            | NI 2                                           |
| VAR 008                                | 7.720 - 7.780            | Tryptophan<br>NI 3                             |
| VAR 009                                | 7.650 - 7.700            | 3-methylhistidine                              |
| VAR 010                                | 7.530 - 7.580            | Tryptophan                                     |
| VAR 011                                | 7.350 - 7.480            | Phenylalanine                                  |
| VAR 012                                | 7.330 - 7.350            | Phenylalanine<br>Tryptophan                    |
| VAR 013                                | 7.260 - 7.320            | Tryptophan<br>NI 4                             |
| VAR 014                                | 7.240 - 7.260            | NI 5                                           |
| VAR 015                                | 7.180 - 7.240            | Tryptophan<br>Tyrosine                         |
| VAR 016                                | 7.080 - 7.140            | Histidine                                      |
| VAR 017                                | 6.998 - 7.071            | 1-methylhistidine<br>3-methylhistidine<br>NI 6 |
| VAR 018                                | 6.954 - 6.986            | NI 7                                           |
| VAR 019                                | 6.890 - 6.950            | Tyrosine                                       |
| VAR 020                                | 6.730 - 6.775            | NI 8                                           |
| VAR 021                                | 6.533 - 6.547            | Fumarate                                       |
| VAR 022                                | 5.907 - 5.946            | Uridine                                        |
| VAR 023                                | 5.720 - 5.865            | NI 9                                           |
| VAR 024                                | 5.405 - 5.415            | Allantoin                                      |
| VAR 025                                | 5.238 - 5.267            | Glucose                                        |
| VAR 026                                | 5.196 - 5.210            | Mannose                                        |
| VAR 027                                | 4.919 - 4.928            | Mannose                                        |
| VAR 028                                | 4.633 - 4.703            | Glucose<br>Hydroxyproline<br>NI 10             |
| VAR 029                                | 4.560 - 4.614            | Carnitine                                      |
| VAR 030                                | 4.528 - 4.540            | NI 11                                          |
| VAR 031                                | 4.521 - 4.527            | NI 12                                          |
| VAR 032                                | 4.450 - 4.490            | NI 13                                          |

|                |                      |                                                                                                                                                                                     |
|----------------|----------------------|-------------------------------------------------------------------------------------------------------------------------------------------------------------------------------------|
| <b>VAR 033</b> | <b>4.347 - 4.430</b> | Hydroxyproline<br>N-acetylcysteine<br>Uridine<br>Lipids: C <sub>1</sub> H and C <sub>3</sub> H in glycerol backbone of PL and TG                                                    |
| <b>VAR 034</b> | <b>4.299 - 4.347</b> | Lipids: (O-CH <sub>2</sub> -CH <sub>2</sub> -N <sup>+</sup> (CH <sub>3</sub> ) <sub>3</sub> ) of PC and SM; C <sub>1</sub> H and C <sub>3</sub> H in glycerol backbone of PL and TG |
| <b>VAR 035</b> | <b>4.269 - 4.299</b> | Threonine<br>Lipids: (O-CH <sub>2</sub> -CH <sub>2</sub> -N <sup>+</sup> (CH <sub>3</sub> ) <sub>3</sub> ) of PC and SM                                                             |
| <b>VAR 036</b> | <b>4.237 - 4.269</b> | Threonine<br>Uridine                                                                                                                                                                |
| <b>VAR 037</b> | <b>4.172 - 4.216</b> | Pyroglutamate<br>β-Hydroxybutyrate                                                                                                                                                  |
| <b>VAR 038</b> | <b>4.153 - 4.172</b> | Proline<br>Uridine<br>β-Hydroxybutyrate                                                                                                                                             |
| <b>VAR 039</b> | <b>4.147 - 4.153</b> | Lactate<br>Proline<br>Uridine                                                                                                                                                       |
| <b>VAR 040</b> | <b>4.133 - 4.147</b> | Lactate<br>Proline<br>Uridine<br>β-Hydroxybutyrate<br>Cystine                                                                                                                       |
| <b>VAR 041</b> | <b>4.110 - 4.133</b> | Lactate<br>Cystine                                                                                                                                                                  |
| <b>VAR 042</b> | <b>4.054 - 4.102</b> | Choline<br>Creatinine<br>Myoinositol<br>Tryptophan<br>Isopropanol<br>NI 14                                                                                                          |
| <b>VAR 043</b> | <b>4.043 - 4.054</b> | Isopropanol<br>NI 14                                                                                                                                                                |
| <b>VAR 044</b> | <b>4.034 - 4.043</b> | Isopropanol                                                                                                                                                                         |
| <b>VAR 045</b> | <b>4.021 - 4.034</b> | 2-hydroxybutyrate<br>Asparagine<br>Phenylalanine<br>Serine<br>Isopropanol                                                                                                           |
| <b>VAR 046</b> | <b>4.006 - 4.021</b> | 2-hydroxybutyrate<br>Asparagine<br>Histidine<br>Phenylalanine<br>Serine<br>Isopropanol                                                                                              |
| <b>VAR 047</b> | <b>4.001 - 4.006</b> | Histidine<br>Phenylalanine                                                                                                                                                          |

|                |                      |                                                                                     |
|----------------|----------------------|-------------------------------------------------------------------------------------|
|                |                      | Serine                                                                              |
| <b>VAR 048</b> | <b>3.993 - 4.001</b> | 3-methylhistidine<br>Histidine<br>Serine                                            |
| <b>VAR 049</b> | <b>3.985 - 3.992</b> | 3-methylhistidine<br>Cysteine                                                       |
| <b>VAR 050</b> | <b>3.979 - 3.985</b> | 3-methylhistidine<br>Cysteine<br>Serine                                             |
| <b>VAR 051</b> | <b>3.968 - 3.979</b> | 1-methylhistidine<br>3-methylhistidine<br>Cysteine<br>Mannose<br>Serine<br>Tyrosine |
| <b>VAR 052</b> | <b>3.960 - 3.968</b> | 1-methylhistidine<br>Mannose<br>Serine<br>Tyrosine                                  |
| <b>VAR 053</b> | <b>3.954 - 3.960</b> | 1-methylhistidine<br>Mannose<br>Tyrosine                                            |
| <b>VAR 054</b> | <b>3.946 - 3.954</b> | 1-methylhistidine<br>Creatine<br>Mannose<br>Serine                                  |
| <b>VAR 055</b> | <b>3.934 - 3.946</b> | Mannose<br>Uridine                                                                  |
| <b>VAR 056</b> | <b>3.930 - 3.934</b> | Aspartate<br>Glucose                                                                |
| <b>VAR 057</b> | <b>3.914 - 3.930</b> | Aspartate<br>Betaine<br>Glucose<br>Mannose<br>Uridine                               |
| <b>VAR 058</b> | <b>3.909 - 3.914</b> | Aspartate<br>Glucose                                                                |
| <b>VAR 059</b> | <b>3.900 - 3.909</b> | Glucose<br>Mannose<br>NI 15                                                         |
| <b>VAR 060</b> | <b>3.893 - 3.900</b> | NI 15                                                                               |
| <b>VAR 061</b> | <b>3.885 - 3.893</b> | Mannose<br>Methionine                                                               |
| <b>VAR 062</b> | <b>3.873 - 3.885</b> | Glucose<br>Mannose<br>Methionine<br>NI 15                                           |

|                |                      |                                                                                                        |
|----------------|----------------------|--------------------------------------------------------------------------------------------------------|
| <b>VAR 063</b> | <b>3.857 - 3.873</b> | 2-hydroxy-3-methylbutyrate<br>Glucose<br>Mannose<br>Methionine<br>Serine                               |
| <b>VAR 064</b> | <b>3.851 - 3.857</b> | Glucose<br>Mannose<br>Serine                                                                           |
| <b>VAR 065</b> | <b>3.846 - 3.851</b> | Glucose<br>Mannose                                                                                     |
| <b>VAR 066</b> | <b>3.829 - 3.844</b> | Glucose<br>Mannose<br>Uridine                                                                          |
| <b>VAR 067</b> | <b>3.818 - 3.829</b> | Alanine<br>Mannose<br>Uridine<br>Glycerol                                                              |
| <b>VAR 068</b> | <b>3.808 - 3.818</b> | Alanine<br>Ornithine<br>Uridine<br>Glycerol                                                            |
| <b>VAR 069</b> | <b>3.796 - 3.808</b> | Alanine<br>Arginine<br>Glucose<br>Glutamine<br>Mannose<br>Ornithine<br>Glycerol                        |
| <b>VAR 070</b> | <b>3.785 - 3.796</b> | Alanine<br>Arginine<br>Glucose<br>Glutamate<br>Glutamine<br>Lysine<br>Mannose<br>Ornithine<br>Glycerol |
| <b>VAR 071</b> | <b>3.770 - 3.785</b> | Arginine<br>Glucose<br>Glutamate<br>Glutamine<br>Lysine<br>Mannose                                     |
| <b>VAR 072</b> | <b>3.765 - 3.770</b> | Glutamate<br>Leucine<br>Lysine                                                                         |
| <b>VAR 073</b> | <b>3.748 - 3.765</b> | Glucose                                                                                                |

|                |                      |                                                                                                                                                                 |
|----------------|----------------------|-----------------------------------------------------------------------------------------------------------------------------------------------------------------|
|                |                      | Leucine<br>Mannose                                                                                                                                              |
| <b>VAR 074</b> | <b>3.739 - 3.748</b> | Glucose<br>Leucine<br>Mannose<br>2-aminobutyrate                                                                                                                |
| <b>VAR 075</b> | <b>3.728 - 3.739</b> | Glucose<br>2-aminobutyrate                                                                                                                                      |
| <b>VAR 076</b> | <b>3.715 - 3.728</b> | 1-methylhistidine<br>Glucose<br>2-aminobutyrate<br>NI 16                                                                                                        |
| <b>VAR 077</b> | <b>3.709 - 3.713</b> | 3-methylhistidine                                                                                                                                               |
| <b>VAR 078</b> | <b>3.704 - 3.709</b> | NI 16                                                                                                                                                           |
| <b>VAR 079</b> | <b>3.685 - 3.704</b> | Isoleucine<br>Mannose<br>Glycerol<br>NI 16<br>NI 17<br>Lipids: (O-CH <sub>2</sub> -CH <sub>2</sub> -N <sup>+</sup> (CH <sub>3</sub> ) <sub>3</sub> of PC and SM |
| <b>VAR 080</b> | <b>3.678 - 3.685</b> | Mannose<br>Glycerol<br>NI 17<br>Lipids: (O-CH <sub>2</sub> -CH <sub>2</sub> -N <sup>+</sup> (CH <sub>3</sub> ) <sub>3</sub> of PC and SM                        |
| <b>VAR 081</b> | <b>3.673 - 3.678</b> | Mannose<br>Lipids: (O-CH <sub>2</sub> -CH <sub>2</sub> -N <sup>+</sup> (CH <sub>3</sub> ) <sub>3</sub> of PC and SM                                             |
| <b>VAR 082</b> | <b>3.664 - 3.673</b> | Mannose<br>Glycerol<br>NI 17<br>Lipids: (O-CH <sub>2</sub> -CH <sub>2</sub> -N <sup>+</sup> (CH <sub>3</sub> ) <sub>3</sub> of PC and SM                        |
| <b>VAR 083</b> | <b>3.654 - 3.664</b> | Myoinositol<br>Glycerol<br>NI 17<br>Lipids: (O-CH <sub>2</sub> -CH <sub>2</sub> -N <sup>+</sup> (CH <sub>3</sub> ) <sub>3</sub> of PC and SM                    |
| <b>VAR 084</b> | <b>3.649 - 3.654</b> | Lipids: (O-CH <sub>2</sub> -CH <sub>2</sub> -N <sup>+</sup> (CH <sub>3</sub> ) <sub>3</sub> of PC and SM                                                        |
| <b>VAR 085</b> | <b>3.642 - 3.647</b> | Myoinositol                                                                                                                                                     |
| <b>VAR 086</b> | <b>3.633 - 3.641</b> | Valine                                                                                                                                                          |
| <b>VAR 087</b> | <b>3.623 - 3.633</b> | Myoinositol<br>Sarcosine<br>Valine                                                                                                                              |
| <b>VAR 088</b> | <b>3.608 - 3.616</b> | Mannose<br>Threonine                                                                                                                                            |
| <b>VAR 089</b> | <b>3.600 - 3.606</b> | Threonine                                                                                                                                                       |
| <b>VAR 090</b> | <b>3.594 - 3.600</b> | Mannose<br>Glycerol                                                                                                                                             |
| <b>VAR 091</b> | <b>3.584 - 3.589</b> | Glycerol                                                                                                                                                        |
| <b>VAR 092</b> | <b>3.576 - 3.584</b> | Glycine                                                                                                                                                         |

|                |                      |                                            |
|----------------|----------------------|--------------------------------------------|
|                |                      | Mannose<br>Glycerol                        |
| <b>VAR 093</b> | <b>3.559 - 3.572</b> | Glucose<br>Myoinositol<br>Glycerol         |
| <b>VAR 094</b> | <b>3.541 - 3.555</b> | Choline<br>Glucose<br>Myoinositol          |
| <b>VAR 095</b> | <b>3.534 - 3.541</b> | Choline                                    |
| <b>VAR 096</b> | <b>3.524 - 3.534</b> | Choline<br>Glucose                         |
| <b>VAR 097</b> | <b>3.507 - 3.522</b> | Glucose<br>Hydroxyproline<br>Tryptophan    |
| <b>VAR 098</b> | <b>3.500 - 3.504</b> | Glucose<br>Tryptophan                      |
| <b>VAR 099</b> | <b>3.490 - 3.500</b> | Glucose<br>Hydroxyproline<br>Tryptophan    |
| <b>VAR 100</b> | <b>3.467 - 3.490</b> | Glucose<br>Tryptophan                      |
| <b>VAR 101</b> | <b>3.460 - 3.467</b> | Proline<br>Acetoacetate                    |
| <b>VAR 102</b> | <b>3.455 - 3.460</b> | Carnitine                                  |
| <b>VAR 103</b> | <b>3.437 - 3.455</b> | Carnitine<br>Glucose<br>Proline<br>Taurine |
| <b>VAR 104</b> | <b>3.433 - 3.437</b> | Glucose                                    |
| <b>VAR 105</b> | <b>3.429 - 3.433</b> | Proline<br>Taurine                         |
| <b>VAR 106</b> | <b>3.413 - 3.429</b> | Mannose<br>Glucose<br>Proline<br>Cystine   |
| <b>VAR 107</b> | <b>3.401 - 3.413</b> | Glucose<br>Mannose                         |
| <b>VAR 108</b> | <b>3.387 - 3.401</b> | Hydroxyproline<br>Mannose<br>Cystine       |
| <b>VAR 109</b> | <b>3.383 - 3.387</b> | Hydroxyproline                             |
| <b>VAR 110</b> | <b>3.375 - 3.383</b> | Hydroxyproline<br>Proline                  |
| <b>VAR 111</b> | <b>3.354 - 3.373</b> | Proline                                    |
| <b>VAR 112</b> | <b>3.346 - 3.352</b> | Proline<br>Tryptophan                      |
| <b>VAR 113</b> | <b>3.332 - 3.340</b> | 1-methylhistidine                          |

|                |                      |                                                                                                                                                           |
|----------------|----------------------|-----------------------------------------------------------------------------------------------------------------------------------------------------------|
|                |                      | Proline<br>Tryptophan                                                                                                                                     |
| <b>VAR 114</b> | <b>3.313 - 3.325</b> | 1-methylhistidine<br>Myoinositol<br>Phenylalanine<br>Tryptophan                                                                                           |
| <b>VAR 115</b> | <b>3.304 - 3.313</b> | 1-methylhistidine<br>Phenylalanine<br>Tryptophan                                                                                                          |
| <b>VAR 116</b> | <b>3.300 - 3.304</b> | Myoinositol                                                                                                                                               |
| <b>VAR 117</b> | <b>3.291 - 3.300</b> | 1-methylhistidine<br>Phenylalanine<br>Taurine<br>Lipids: (O-CH <sub>2</sub> -CH <sub>2</sub> -N <sup>+</sup> (CH <sub>3</sub> ) <sub>3</sub> of PC and SM |
| <b>VAR 118</b> | <b>3.284 - 3.289</b> | Betaine<br>Myoinositol<br>Phenylalanine<br>Lipids: (O-CH <sub>2</sub> -CH <sub>2</sub> -N <sup>+</sup> (CH <sub>3</sub> ) <sub>3</sub> of PC and SM       |
| <b>VAR 119</b> | <b>3.278 - 3.284</b> | Glucose<br>Histidine<br>Taurine<br>Lipids: (O-CH <sub>2</sub> -CH <sub>2</sub> -N <sup>+</sup> (CH <sub>3</sub> ) <sub>3</sub> of PC and SM               |
| <b>VAR 120</b> | <b>3.270 - 3.278</b> | Arginine<br>Histidine<br>Taurine<br>Lipids: (O-CH <sub>2</sub> -CH <sub>2</sub> -N <sup>+</sup> (CH <sub>3</sub> ) <sub>3</sub> of PC and SM              |
| <b>VAR 121</b> | <b>3.263 - 3.270</b> | Arginine<br>Glucose<br>Lipids: (O-CH <sub>2</sub> -CH <sub>2</sub> -N <sup>+</sup> (CH <sub>3</sub> ) <sub>3</sub> of PC and SM                           |
| <b>VAR 122</b> | <b>3.250 - 3.263</b> | Arginine<br>Glucose<br>Histidine<br>Lipids: (O-CH <sub>2</sub> -CH <sub>2</sub> -N <sup>+</sup> (CH <sub>3</sub> ) <sub>3</sub> of PC and SM              |
| <b>VAR 123</b> | <b>3.244 - 3.250</b> | 1-methylhistidine<br>Carnitine<br>Histidine<br>Lipids: (O-CH <sub>2</sub> -CH <sub>2</sub> -N <sup>+</sup> (CH <sub>3</sub> ) <sub>3</sub> of PC and SM   |
| <b>VAR 124</b> | <b>3.236 - 3.244</b> | Lipids: (O-CH <sub>2</sub> -CH <sub>2</sub> -N <sup>+</sup> (CH <sub>3</sub> ) <sub>3</sub> of PC and SM                                                  |
| <b>VAR 125</b> | <b>3.231 - 3.236</b> | 1-methylhistidine<br>Tyrosine<br>Lipids: (O-CH <sub>2</sub> -CH <sub>2</sub> -N <sup>+</sup> (CH <sub>3</sub> ) <sub>3</sub> of PC and SM                 |
| <b>VAR 126</b> | <b>3.227 - 3.231</b> | Cystine<br>Lipids: (O-CH <sub>2</sub> -CH <sub>2</sub> -N <sup>+</sup> (CH <sub>3</sub> ) <sub>3</sub> of PC and SM                                       |
| <b>VAR 127</b> | <b>3.224 - 3.227</b> | Tyrosine<br>Lipids: (O-CH <sub>2</sub> -CH <sub>2</sub> -N <sup>+</sup> (CH <sub>3</sub> ) <sub>3</sub> of PC and SM                                      |
| <b>VAR 128</b> | <b>3.217 - 3.222</b> | 1-methylhistidine<br>Choline                                                                                                                              |

|                |                      |                                                                                                                                                                                        |
|----------------|----------------------|----------------------------------------------------------------------------------------------------------------------------------------------------------------------------------------|
|                |                      | Tyrosine<br>Lipids: (O-CH <sub>2</sub> -CH <sub>2</sub> -N <sup>+</sup> (CH <sub>3</sub> ) <sub>3</sub> of PC and SM                                                                   |
| <b>VAR 129</b> | <b>3.211 - 3.217</b> | β-alanine<br>Tyrosine<br>Cystine<br>Lipids: (O-CH <sub>2</sub> -CH <sub>2</sub> -N <sup>+</sup> (CH <sub>3</sub> ) <sub>3</sub> of PC and SM                                           |
| <b>VAR 130</b> | <b>3.195 - 3.211</b> | 1-methylhistidine<br>3-methylhistidine<br>β-alanine<br>Tyrosine<br>Cystine<br>Lipids: (O-CH <sub>2</sub> -CH <sub>2</sub> -N <sup>+</sup> (CH <sub>3</sub> ) <sub>3</sub> of PC and SM |
| <b>VAR 131</b> | <b>3.187 - 3.193</b> | β-alanine<br>Cystine                                                                                                                                                                   |
| <b>VAR 132</b> | <b>3.177 - 3.183</b> | 3-methylhistidine<br>Histidine                                                                                                                                                         |
| <b>VAR 133</b> | <b>3.169 - 3.175</b> | 3-methylhistidine                                                                                                                                                                      |
| <b>VAR 134</b> | <b>3.135 - 3.169</b> | Histidine<br>Phenylalanine                                                                                                                                                             |
| <b>VAR 135</b> | <b>3.122 - 3.134</b> | Cysteine<br>Phenylalanine                                                                                                                                                              |
| <b>VAR 136</b> | <b>3.100 - 3.122</b> | 3-methylhistidine<br>Cysteine                                                                                                                                                          |
| <b>VAR 137</b> | <b>3.090 - 3.100</b> | 3-methylhistidine<br>Cysteine<br>Tyrosine                                                                                                                                              |
| <b>VAR 138</b> | <b>3.077 - 3.090</b> | 3-methyl-2-oxobutyrate<br>3-methylhistidine<br>Ornithine<br>Tyrosine                                                                                                                   |
| <b>VAR 139</b> | <b>3.066 - 3.077</b> | 3-methyl-2-oxobutyrate<br>3-methylhistidine<br>Cysteine<br>Ornithine<br>Tyrosine                                                                                                       |
| <b>VAR 140</b> | <b>3.060 - 3.066</b> | 3-methyl-2-oxobutyrate<br>Creatinine<br>Cysteine<br>Ornithine                                                                                                                          |
| <b>VAR 141</b> | <b>3.053 - 3.060</b> | 3-methyl-2-oxobutyrate<br>Creatine<br>Lysine<br>Tyrosine                                                                                                                               |
| <b>VAR 142</b> | <b>3.040 - 3.053</b> | 3-methyl-2-oxobutyrate<br>4-aminobutyrate<br>Cysteine<br>Lysine                                                                                                                        |



|                |                      |                                                               |
|----------------|----------------------|---------------------------------------------------------------|
| <b>VAR 143</b> | <b>3.035 - 3.040</b> | 3-methyl-2-oxobutyrate<br>Cysteine<br>$\alpha$ -ketoglutarate |
| <b>VAR 144</b> | <b>3.029 - 3.035</b> | 4-aminobutyrate<br>Lysine                                     |
| <b>VAR 145</b> | <b>3.023 - 3.029</b> | 3-methyl-2-oxobutyrate<br>$\alpha$ -ketoglutarate             |
| <b>VAR 146</b> | <b>3.017 - 3.023</b> | 4-aminobutyrate                                               |
| <b>VAR 147</b> | <b>3.010 - 3.017</b> | $\alpha$ -ketoglutarate                                       |
| <b>VAR 148</b> | <b>2.979 - 2.991</b> | Asparagine                                                    |
| <b>VAR 149</b> | <b>2.966 - 2.979</b> | 3-methyl-2-oxopentanoate<br>N-acetylcysteine                  |
| <b>VAR 150</b> | <b>2.958 - 2.966</b> | 3-methyl-2-oxopentanoate<br>Asparagine                        |
| <b>VAR 151</b> | <b>2.950 - 2.958</b> | Asparagine<br>N-acetylcysteine                                |
| <b>VAR 152</b> | <b>2.911 - 2.950</b> | 3-methyl-2-oxopentanoate<br>N-acetylcysteine                  |
| <b>VAR 153</b> | <b>2.875 - 2.904</b> | Asparagine                                                    |
| <b>VAR 154</b> | <b>2.854 - 2.875</b> | Asparagine<br>Lipids: $=CH-CH_2-CH=$ in FAC                   |
| <b>VAR 155</b> | <b>2.812 - 2.854</b> | Aspartate<br>Lipids: $=CH-CH_2-CH=$ in FAC                    |
| <b>VAR 156</b> | <b>2.762 - 2.812</b> | Lipids: $=CH-CH_2-CH=$ in FAC                                 |
| <b>VAR 157</b> | <b>2.757 - 2.762</b> | Sarcosine<br>Lipids: $=CH-CH_2-CH=$ in FAC                    |
| <b>VAR 158</b> | <b>2.741 - 2.757</b> | Lipids: $=CH-CH_2-CH=$ in FAC                                 |
| <b>VAR 159</b> | <b>2.724 - 2.741</b> | NI 18<br>Lipids: $=CH-CH_2-CH=$ in FAC                        |
| <b>VAR 160</b> | <b>2.718 - 2.724</b> | Aspartate<br>Lipids: $=CH-CH_2-CH=$ in FAC                    |
| <b>VAR 161</b> | <b>2.712 - 2.718</b> | Lipids: $=CH-CH_2-CH=$ in FAC                                 |
| <b>VAR 162</b> | <b>2.702 - 2.712</b> | Aspartate<br>Citrate                                          |
| <b>VAR 163</b> | <b>2.690 - 2.694</b> | Aspartate                                                     |
| <b>VAR 164</b> | <b>2.673 - 2.685</b> | Aspartate<br>Citrate<br>Methionine                            |
| <b>VAR 165</b> | <b>2.647 - 2.668</b> | Methionine                                                    |
| <b>VAR 166</b> | <b>2.615 - 2.634</b> | 4-methyl-2-oxovalerate                                        |
| <b>VAR 167</b> | <b>2.571 - 2.592</b> | $\beta$ -alanine                                              |
| <b>VAR 168</b> | <b>2.533 - 2.571</b> | $\beta$ -alanine<br>Citrate<br>Pyroglutamate                  |
| <b>VAR 169</b> | <b>2.501 - 2.533</b> | Glutamine<br>Pyroglutamate                                    |

|                |                      |                                                                                                 |
|----------------|----------------------|-------------------------------------------------------------------------------------------------|
| <b>VAR 170</b> | <b>2.484 - 2.501</b> | Carnitine<br>Glutamine<br>Pyroglutamate                                                         |
| <b>VAR 171</b> | <b>2.476 - 2.484</b> | Glutamine                                                                                       |
| <b>VAR 172</b> | <b>2.450 - 2.476</b> | Carnitine<br>Glutamine<br>Hydroxyproline<br>$\alpha$ -ketoglutarate                             |
| <b>VAR 173</b> | <b>2.439 - 2.450</b> | Carnitine<br>Glutamine<br>Hydroxyproline<br>$\alpha$ -ketoglutarate<br>$\beta$ -Hydroxybutyrate |
| <b>VAR 174</b> | <b>2.427 - 2.439</b> | Carnitine<br>Glutamine<br>Hydroxyproline<br>Pyroglutamate<br>$\beta$ -Hydroxybutyrate           |
| <b>VAR 175</b> | <b>2.418 - 2.427</b> | Carnitine<br>Pyroglutamate<br>Succinate<br>$\beta$ -Hydroxybutyrate                             |
| <b>VAR 176</b> | <b>2.405 - 2.418</b> | Glutamate<br>Pyroglutamate<br>$\beta$ -Hydroxybutyrate                                          |
| <b>VAR 177</b> | <b>2.380 - 2.405</b> | 3-hydroxy-3-methylbutyrate<br>Glutamate<br>Oxaloacetate<br>Proline<br>Pyruvate                  |
| <b>VAR 178</b> | <b>2.349 - 2.380</b> | Glutamate<br>Proline                                                                            |
| <b>VAR 179</b> | <b>2.337 - 2.349</b> | Glutamate<br>Proline<br>$\beta$ -Hydroxybutyrate                                                |
| <b>VAR 180</b> | <b>2.324 - 2.337</b> | 4-aminobutyrate<br>Glutamate<br>Valine<br>$\beta$ -Hydroxybutyrate                              |
| <b>VAR 181</b> | <b>2.312 - 2.324</b> | 4-aminobutyrate<br>Valine<br>$\beta$ -Hydroxybutyrate                                           |
| <b>VAR 182</b> | <b>2.305 - 2.312</b> | Valine<br>$\beta$ -Hydroxybutyrate                                                              |
| <b>VAR 183</b> | <b>2.294 - 2.305</b> | 4-aminobutyrate<br>Valine<br>Acetoacetate                                                       |

|                |                      |                                                                                                                                              |
|----------------|----------------------|----------------------------------------------------------------------------------------------------------------------------------------------|
| <b>VAR 184</b> | <b>2.282 - 2.294</b> | Valine                                                                                                                                       |
| <b>VAR 185</b> | <b>2.264 - 2.282</b> | Valine<br>Lipids: -CH <sub>2</sub> -C=O or -CH <sub>2</sub> -CH=CH- in FAC                                                                   |
| <b>VAR 186</b> | <b>2.254 - 2.264</b> | Lipids: -CH <sub>2</sub> -C=O or -CH <sub>2</sub> -CH=CH- in FAC                                                                             |
| <b>VAR 187</b> | <b>2.221 - 2.254</b> | Methionine<br>Lipids: -CH <sub>2</sub> -C=O or -CH <sub>2</sub> -CH=CH- in FAC                                                               |
| <b>VAR 188</b> | <b>2.208 - 2.221</b> | Methionine                                                                                                                                   |
| <b>VAR 189</b> | <b>2.151 - 2.208</b> | Glutamate<br>Glutamine<br>Hydroxyproline<br>Methionine                                                                                       |
| <b>VAR 190</b> | <b>2.128 - 2.151</b> | 4-methyl-2-oxovalerate<br>Glutamate<br>Glutamine<br>Methionine                                                                               |
| <b>VAR 191</b> | <b>2.114 - 2.128</b> | 4-methyl-2-oxovalerate<br>Glutamate<br>Glutamine<br>Methionine<br>Proline                                                                    |
| <b>VAR 192</b> | <b>2.102 - 2.114</b> | 4-methyl-2-oxovalerate<br>Glutamate<br>Glutamine<br>Methionine<br>Proline<br>Lipids: -CH <sub>2</sub> -CH=CH- in FAC; CH <sub>3</sub> of NAG |
| <b>VAR 193</b> | <b>2.078 - 2.102</b> | Glutamate<br>N-acetylcysteine<br>Proline<br>Pyroglutamate<br>Lipids: -CH <sub>2</sub> -CH=CH- in FAC; CH <sub>3</sub> of NAG                 |
| <b>VAR 194</b> | <b>2.042 - 2.078</b> | 2-hydroxy-3-methylbutyrate<br>Glutamate<br>Proline<br>Pyroglutamate<br>Lipids: -CH <sub>2</sub> -CH=CH- in FAC; CH <sub>3</sub> of NAG       |
| <b>VAR 195</b> | <b>2.013 - 2.042</b> | 2-hydroxy-3-methylbutyrate<br>Isoleucine<br>Proline<br>Pyroglutamate<br>Lipids: -CH <sub>2</sub> -CH=CH- in FAC; CH <sub>3</sub> of NAG      |
| <b>VAR 196</b> | <b>2.001 - 2.013</b> | Isoleucine<br>Ornithine<br>Proline<br>Lipids: -CH <sub>2</sub> -CH=CH- in FAC; CH <sub>3</sub> of NAG                                        |

|                |                      |                                                                                                                                      |
|----------------|----------------------|--------------------------------------------------------------------------------------------------------------------------------------|
| <b>VAR 197</b> | <b>1.967 - 2.001</b> | Arginine<br>Isoleucine<br>Ornithine<br>Proline<br>2-aminobutyrate<br>Lipids: -CH <sub>2</sub> -CH=CH- in FAC; CH <sub>3</sub> of NAG |
| <b>VAR 198</b> | <b>1.949 - 1.967</b> | Arginine<br>Lysine<br>Ornithine<br>2-aminobutyrate                                                                                   |
| <b>VAR 199</b> | <b>1.906 - 1.949</b> | 4-aminobutyrate<br>Acetate<br>Arginine<br>Lysine<br>Ornithine<br>2-aminobutyrate                                                     |
| <b>VAR 200</b> | <b>1.823 - 1.906</b> | 4-aminobutyrate<br>Arginine<br>Lysine<br>Ornithine<br>2-aminobutyrate                                                                |
| <b>VAR 201</b> | <b>1.800 - 1.823</b> | Ornithine                                                                                                                            |
| <b>VAR 202</b> | <b>1.729 - 1.800</b> | 2-hydroxybutyrate<br>3-methyl-2-oxopentanoate<br>Arginine<br>Leucine<br>Lysine<br>Ornithine                                          |
| <b>VAR 203</b> | <b>1.717 - 1.729</b> | 2-hydroxybutyrate<br>3-methyl-2-oxopentanoate<br>Arginine<br>Leucine<br>Lysine                                                       |
| <b>VAR 204</b> | <b>1.678 - 1.717</b> | 2-hydroxybutyrate<br>3-methyl-2-oxopentanoate<br>Arginine<br>Leucine                                                                 |
| <b>VAR 205</b> | <b>1.655 - 1.678</b> | 2-hydroxybutyrate<br>Arginine                                                                                                        |
| <b>VAR 206</b> | <b>1.650 - 1.655</b> | Arginine                                                                                                                             |
| <b>VAR 207</b> | <b>1.630 - 1.650</b> | 2-hydroxybutyrate<br>Arginine<br>Lipids: -CH <sub>2</sub> -CH <sub>2</sub> -C=O or -CH <sub>2</sub> -CH <sub>2</sub> -CH=CH- in FAC  |
| <b>VAR 208</b> | <b>1.572 - 1.630</b> | Lipids: -CH <sub>2</sub> -CH <sub>2</sub> -C=O or -CH <sub>2</sub> -CH <sub>2</sub> -CH=CH- in FAC                                   |
| <b>VAR 209</b> | <b>1.535 - 1.572</b> | Lysine<br>Lipids: -CH <sub>2</sub> -CH <sub>2</sub> -C=O or -CH <sub>2</sub> -CH <sub>2</sub> -CH=CH- in FAC                         |

|                |                      |                                                                                                               |
|----------------|----------------------|---------------------------------------------------------------------------------------------------------------|
| <b>VAR 210</b> | <b>1.509 - 1.535</b> | Isoleucine<br>Lysine                                                                                          |
| <b>VAR 211</b> | <b>1.489 - 1.509</b> | Alanine<br>Isoleucine<br>Lysine                                                                               |
| <b>VAR 212</b> | <b>1.446 - 1.489</b> | 3-methyl-2-oxopentanoate<br>Isoleucine<br>Lysine                                                              |
| <b>VAR 213</b> | <b>1.408 - 1.446</b> | 3-methyl-2-oxopentanoate<br>Lysine<br>NI 19                                                                   |
| <b>VAR 214</b> | <b>1.358 - 1.405</b> | Lipids: CH <sub>3</sub> -(CH <sub>2</sub> ) <sub>n</sub> - in FAC                                             |
| <b>VAR 215</b> | <b>1.338 - 1.358</b> | Lactate<br>Threonine<br>Lipids: CH <sub>3</sub> -(CH <sub>2</sub> ) <sub>n</sub> - in FAC                     |
| <b>VAR 216</b> | <b>1.296 - 1.338</b> | Lipids: CH <sub>3</sub> -(CH <sub>2</sub> ) <sub>n</sub> - in FAC                                             |
| <b>VAR 217</b> | <b>1.289 - 1.296</b> | Isoleucine<br>Lipids: CH <sub>3</sub> -(CH <sub>2</sub> ) <sub>n</sub> - in FAC                               |
| <b>VAR 218</b> | <b>1.285 - 1.289</b> | 3-hydroxy-3-methylbutyrate<br>Isoleucine<br>Lipids: CH <sub>3</sub> -(CH <sub>2</sub> ) <sub>n</sub> - in FAC |
| <b>VAR 219</b> | <b>1.226 - 1.285</b> | Isoleucine<br>Lipids: CH <sub>3</sub> -(CH <sub>2</sub> ) <sub>n</sub> - in FAC                               |
| <b>VAR 220</b> | <b>1.211 - 1.226</b> | Isoleucine<br>β-Hydroxybutyrate<br>Lipids: CH <sub>3</sub> -(CH <sub>2</sub> ) <sub>n</sub> - in FAC          |
| <b>VAR 221</b> | <b>1.200 - 1.211</b> | Lipids: CH <sub>3</sub> -(CH <sub>2</sub> ) <sub>n</sub> - in FAC                                             |
| <b>VAR 222</b> | <b>1.182 - 1.198</b> | Isopropanol                                                                                                   |
| <b>VAR 223</b> | <b>1.128 - 1.151</b> | 3-methyl-2-oxobutyrate                                                                                        |
| <b>VAR 224</b> | <b>1.103 - 1.123</b> | 3-methyl-2-oxopentanoate                                                                                      |
| <b>VAR 225</b> | <b>1.078 - 1.101</b> | NI 20                                                                                                         |
| <b>VAR 226</b> | <b>1.052 - 1.072</b> | Valine                                                                                                        |
| <b>VAR 227</b> | <b>1.020 - 1.039</b> | Isoleucine                                                                                                    |
| <b>VAR 228</b> | <b>1.008 - 1.020</b> | Valine<br>2-aminobutyrate                                                                                     |
| <b>VAR 229</b> | <b>1.001 - 1.008</b> | Valine                                                                                                        |
| <b>VAR 230</b> | <b>0.996 - 1.001</b> | 2-aminobutyrate                                                                                               |
| <b>VAR 231</b> | <b>0.984 - 0.996</b> | 2-hydroxy-3-methylbutyrate<br>Leucine<br>2-aminobutyrate                                                      |
| <b>VAR 232</b> | <b>0.976 - 0.984</b> | 2-hydroxy-3-methylbutyrate<br>Leucine                                                                         |
| <b>VAR 233</b> | <b>0.964 - 0.976</b> | Isoleucine<br>Leucine                                                                                         |
| <b>VAR 234</b> | <b>0.938 - 0.964</b> | 4-methyl-2-oxovalerate<br>Isoleucine                                                                          |

|                |                      |                                                                                                       |
|----------------|----------------------|-------------------------------------------------------------------------------------------------------|
| <b>VAR 235</b> | <b>0.929 - 0.938</b> | 2-hydroxybutyrate                                                                                     |
| <b>VAR 236</b> | <b>0.882 - 0.929</b> | 2-hydroxybutyrate<br>3-methyl-2-oxopentanoate<br>Lipids: $\text{CH}_3\text{-(CH}_2)_n\text{-}$ in FAC |
| <b>VAR 237</b> | <b>0.800 - 0.882</b> | 2-hydroxy-3-methylbutyrate<br>Lipids: $\text{CH}_3\text{-(CH}_2)_n\text{-}$ in FAC                    |

Table S2: Overview of the intrasample variability of the 237 integration regions. Shown is the small relative standard deviation (%RSD) of each variable based on the analysis of 12 identical plasma samples from a plasma pool. The signal of maleic acid was used to normalize all integration regions. Integration regions having an %RSD >10% are colored in red and were excluded from further statistical analysis. RSD: Relative standard deviation; VAR: variable.

| Assigned integration<br>number (variable) | RSD(%) | Assigned integration<br>number (variable) | RSD(%) |
|-------------------------------------------|--------|-------------------------------------------|--------|
| VAR 001                                   | 11.75  | VAR 042                                   | 1.62   |
| VAR 002                                   | 6.10   | VAR 043                                   | 2.76   |
| VAR 003                                   | 6.79   | VAR 044                                   | 4.38   |
| VAR 004                                   | 5.72   | VAR 045                                   | 1.60   |
| VAR 005                                   | 5.76   | VAR 046                                   | 2.27   |
| VAR 006                                   | 6.21   | VAR 047                                   | 3.07   |
| VAR 007                                   | 5.57   | VAR 048                                   | 1.69   |
| VAR 008                                   | 5.07   | VAR 049                                   | 3.61   |
| VAR 009                                   | 13.59  | VAR 050                                   | 2.52   |
| VAR 010                                   | 7.13   | VAR 051                                   | 1.59   |
| VAR 011                                   | 2.70   | VAR 052                                   | 2.41   |
| VAR 012                                   | 2.93   | VAR 053                                   | 4.07   |
| VAR 013                                   | 4.75   | VAR 054                                   | 2.43   |
| VAR 014                                   | 6.38   | VAR 055                                   | 2.27   |
| VAR 015                                   | 2.82   | VAR 056                                   | 4.15   |
| VAR 016                                   | 3.73   | VAR 057                                   | 1.24   |
| VAR 017                                   | 4.20   | VAR 058                                   | 3.36   |
| VAR 018                                   | 7.42   | VAR 059                                   | 2.25   |
| VAR 019                                   | 1.95   | VAR 060                                   | 2.96   |
| VAR 020                                   | 5.22   | VAR 061                                   | 2.74   |
| VAR 021                                   | 336.77 | VAR 062                                   | 0.99   |
| VAR 022                                   | 18.02  | VAR 063                                   | 0.94   |
| VAR 023                                   | 5.03   | VAR 064                                   | 0.87   |
| VAR 024                                   | 13.9   | VAR 065                                   | 2.31   |
| VAR 025                                   | 1.41   | VAR 066                                   | 0.97   |
| VAR 026                                   | 6.94   | VAR 067                                   | 3.87   |
| VAR 027                                   | 55.22  | VAR 068                                   | 2.24   |
| VAR 028                                   | 4.56   | VAR 069                                   | 2.43   |
| VAR 029                                   | 18.82  | VAR 070                                   | 1.00   |
| VAR 030                                   | 9.83   | VAR 071                                   | 1.52   |
| VAR 031                                   | 13.26  | VAR 072                                   | 1.55   |
| VAR 032                                   | 8.08   | VAR 073                                   | 1.15   |
| VAR 033                                   | 5.38   | VAR 074                                   | 2.48   |
| VAR 034                                   | 3.25   | VAR 075                                   | 1.10   |
| VAR 035                                   | 3.07   | VAR 076                                   | 1.04   |
| VAR 036                                   | 3.71   | VAR 077                                   | 6.73   |
| VAR 037                                   | 3.45   | VAR 078                                   | 1.84   |
| VAR 038                                   | 2.68   | VAR 079                                   | 1.78   |
| VAR 039                                   | 1.49   | VAR 080                                   | 2.01   |

|         |      |         |      |
|---------|------|---------|------|
| VAR 040 | 1.93 | VAR 081 | 1.63 |
| VAR 041 | 1.27 | VAR 082 | 3.00 |
| VAR 083 | 2.78 | VAR 129 | 3.13 |
| VAR 084 | 3.19 | VAR 130 | 5.33 |
| VAR 085 | 3.14 | VAR 131 | 7.77 |
| VAR 086 | 2.39 | VAR 132 | 6.94 |
| VAR 087 | 2.45 | VAR 133 | 4.42 |
| VAR 088 | 1.54 | VAR 134 | 7.16 |
| VAR 089 | 3.39 | VAR 135 | 6.93 |
| VAR 090 | 2.87 | VAR 136 | 6.56 |
| VAR 091 | 1.93 | VAR 137 | 4.51 |
| VAR 092 | 2.23 | VAR 138 | 5.14 |
| VAR 093 | 0.90 | VAR 139 | 3.39 |
| VAR 094 | 1.32 | VAR 140 | 2.12 |
| VAR 095 | 6.14 | VAR 141 | 2.63 |
| VAR 096 | 1.54 | VAR 142 | 2.77 |
| VAR 097 | 1.46 | VAR 143 | 3.05 |
| VAR 098 | 4.70 | VAR 144 | 3.26 |
| VAR 099 | 1.71 | VAR 145 | 4.51 |
| VAR 100 | 1.27 | VAR 146 | 4.10 |
| VAR 101 | 3.80 | VAR 147 | 3.88 |
| VAR 102 | 2.15 | VAR 148 | 4.66 |
| VAR 103 | 1.74 | VAR 149 | 2.33 |
| VAR 104 | 3.24 | VAR 150 | 5.06 |
| VAR 105 | 5.54 | VAR 151 | 3.61 |
| VAR 106 | 1.21 | VAR 152 | 4.00 |
| VAR 107 | 1.83 | VAR 153 | 6.54 |
| VAR 108 | 5.20 | VAR 154 | 4.29 |
| VAR 109 | 3.57 | VAR 155 | 1.87 |
| VAR 110 | 3.85 | VAR 156 | 2.60 |
| VAR 111 | 3.85 | VAR 157 | 3.75 |
| VAR 112 | 4.67 | VAR 158 | 1.85 |
| VAR 113 | 7.07 | VAR 159 | 2.74 |
| VAR 114 | 4.07 | VAR 160 | 4.81 |
| VAR 115 | 6.26 | VAR 161 | 2.19 |
| VAR 116 | 7.01 | VAR 162 | 2.41 |
| VAR 117 | 3.12 | VAR 163 | 8.03 |
| VAR 118 | 4.67 | VAR 164 | 2.05 |
| VAR 119 | 1.15 | VAR 165 | 5.74 |
| VAR 120 | 2.74 | VAR 166 | 9.20 |
| VAR 121 | 1.46 | VAR 167 | 7.22 |
| VAR 122 | 2.95 | VAR 168 | 3.70 |
| VAR 123 | 2.47 | VAR 169 | 6.31 |
| VAR 124 | 2.05 | VAR 170 | 3.42 |
| VAR 125 | 2.63 | VAR 171 | 1.39 |
| VAR 126 | 1.82 | VAR 172 | 2.05 |



|                |             |                |             |
|----------------|-------------|----------------|-------------|
| <b>VAR 127</b> | <b>7.30</b> | <b>VAR 173</b> | <b>3.41</b> |
| <b>VAR 128</b> | <b>2.76</b> | <b>VAR 174</b> | <b>4.11</b> |
| <b>VAR 175</b> | <b>3.33</b> | <b>VAR 207</b> | <b>3.57</b> |
| <b>VAR 176</b> | <b>3.41</b> | <b>VAR 208</b> | <b>3.88</b> |
| <b>VAR 177</b> | <b>3.94</b> | <b>VAR 209</b> | <b>2.37</b> |
| <b>VAR 178</b> | <b>2.56</b> | <b>VAR 210</b> | <b>3.28</b> |
| <b>VAR 179</b> | <b>3.27</b> | <b>VAR 211</b> | <b>1.33</b> |
| <b>VAR 180</b> | <b>2.27</b> | <b>VAR 212</b> | <b>2.72</b> |
| <b>VAR 181</b> | <b>2.84</b> | <b>VAR 213</b> | <b>2.25</b> |
| <b>VAR 182</b> | <b>3.97</b> | <b>VAR 214</b> | <b>2.33</b> |
| <b>VAR 183</b> | <b>2.02</b> | <b>VAR 215</b> | <b>3.11</b> |
| <b>VAR 184</b> | <b>4.94</b> | <b>VAR 216</b> | <b>1.72</b> |
| <b>VAR 185</b> | <b>4.80</b> | <b>VAR 217</b> | <b>3.85</b> |
| <b>VAR 186</b> | <b>3.61</b> | <b>VAR 218</b> | <b>3.51</b> |
| <b>VAR 187</b> | <b>2.31</b> | <b>VAR 219</b> | <b>3.97</b> |
| <b>VAR 188</b> | <b>1.88</b> | <b>VAR 220</b> | <b>1.22</b> |
| <b>VAR 189</b> | <b>1.83</b> | <b>VAR 221</b> | <b>2.49</b> |
| <b>VAR 190</b> | <b>3.22</b> | <b>VAR 222</b> | <b>2.76</b> |
| <b>VAR 191</b> | <b>2.28</b> | <b>VAR 223</b> | <b>2.93</b> |
| <b>VAR 192</b> | <b>2.57</b> | <b>VAR 224</b> | <b>4.45</b> |
| <b>VAR 193</b> | <b>1.97</b> | <b>VAR 225</b> | <b>4.24</b> |
| <b>VAR 194</b> | <b>2.72</b> | <b>VAR 226</b> | <b>1.52</b> |
| <b>VAR 195</b> | <b>1.72</b> | <b>VAR 227</b> | <b>2.39</b> |
| <b>VAR 196</b> | <b>1.87</b> | <b>VAR 228</b> | <b>1.61</b> |
| <b>VAR 197</b> | <b>1.94</b> | <b>VAR 229</b> | <b>1.18</b> |
| <b>VAR 198</b> | <b>1.80</b> | <b>VAR 230</b> | <b>2.06</b> |
| <b>VAR 199</b> | <b>4.64</b> | <b>VAR 231</b> | <b>1.50</b> |
| <b>VAR 200</b> | <b>5.93</b> | <b>VAR 232</b> | <b>2.68</b> |
| <b>VAR 201</b> | <b>2.50</b> | <b>VAR 233</b> | <b>2.05</b> |
| <b>VAR 202</b> | <b>3.37</b> | <b>VAR 234</b> | <b>2.25</b> |
| <b>VAR 203</b> | <b>2.67</b> | <b>VAR 235</b> | <b>3.66</b> |
| <b>VAR 204</b> | <b>3.34</b> | <b>VAR 236</b> | <b>1.87</b> |
| <b>VAR 205</b> | <b>3.45</b> | <b>VAR 237</b> | <b>2.50</b> |
| <b>VAR 206</b> | <b>4.63</b> |                |             |

Table S3: Overview of the 30 variables with the highest total VIP-value based on the OPLS-DA model constructed with 78 variables. The variables are shown with decreasing VIP-value. Red and green arrows indicate respectively a decrease or increase in integration values of these variables in lung cancer patients compared to healthy controls. VAR: variable (assigned integration number); VIP: variable importance in projection.

| Assigned integration<br>number (variable) | Total VIP-value | Assigned integration<br>number (variable) | Total VIP-value |
|-------------------------------------------|-----------------|-------------------------------------------|-----------------|
| VAR 195                                   | 3.61 ↓          | VAR 061                                   | 1.19 ↑          |
| VAR 218                                   | 2.28 ↓          | VAR 034                                   | 1.18 ↓          |
| VAR 186                                   | 2.19 ↓          | VAR 080                                   | 1.10 ↑          |
| VAR 185                                   | 2.13 ↓          | VAR 126                                   | 1.10 ↓          |
| VAR 187                                   | 2.03 ↓          | VAR 062                                   | 1.10 ↑          |
| VAR 156                                   | 1.88 ↓          | VAR 082                                   | 1.03 ↑          |
| VAR 057                                   | 1.83 ↑          | VAR 067                                   | 1.03 ↑          |
| VAR 222                                   | 1.83 ↑          | VAR 127                                   | 0.95 ↓          |
| VAR 042                                   | 1.57 ↓          | VAR 081                                   | 0.95 ↑          |
| VAR 059                                   | 1.54 ↑          | VAR 055                                   | 0.87 ↑          |
| VAR 066                                   | 1.31 ↑          | VAR 207                                   | 0.86 ↓          |
| VAR 035                                   | 1.27 ↓          | VAR 202                                   | 0.85 ↑          |
| VAR 060                                   | 1.25 ↑          | VAR 090                                   | 0.85 ↑          |
| VAR 227                                   | 1.25 ↑          | VAR 083                                   | 0.84 ↑          |
| VAR 209                                   | 1.22 ↓          | VAR 078                                   | 0.82 ↑          |

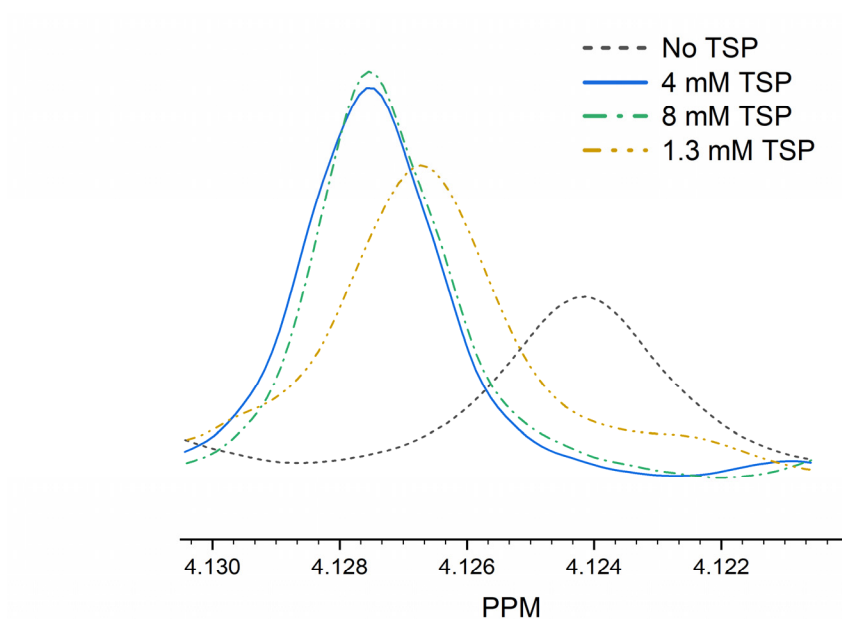

Figure S1: Zoom-in of a lactate signal (of the  $\alpha\text{CH}$  quadruplet) upon the addition of different amounts of TSP. After addition of 4 mM TSP, stable chemical shifts and signal intensities are reached. Higher TSP concentrations do not influence the spectrum further. TSP: trimethylsilyl-2,2,3,3-tetradeteropropionic acid.

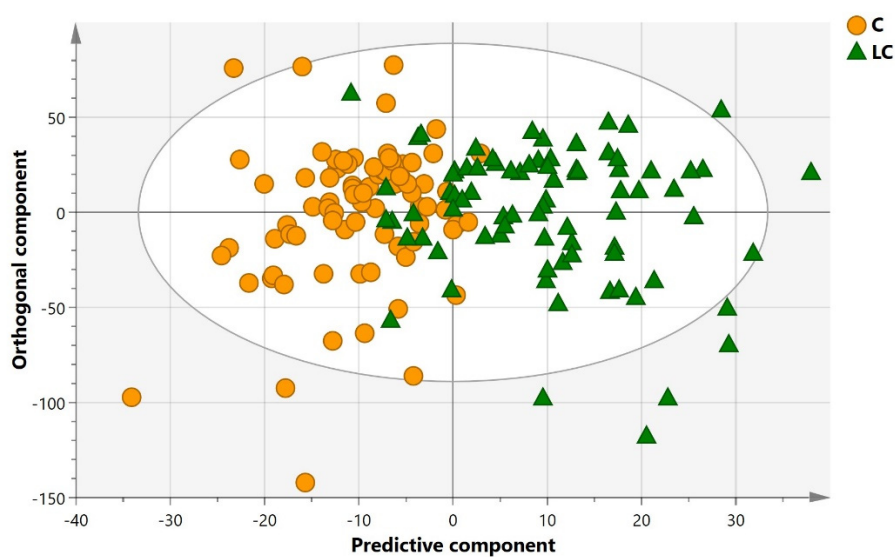

Figure S2: Orthogonal partial least squares discriminant analysis (OPLS-DA) classifier of the training cohort consisting of 80 controls and 80 lung cancer patients, using 221 variables. Model parameter values of  $R^2X(\text{cum})$ ,  $R^2Y(\text{cum})$  and  $Q^2(\text{cum})$  are 0.833, 0.577 and 0.337 respectively. From this model, values of the loadings and jack knife interval are extracted for each variable in order to perform data reduction. C: controls; LC: lung cancer patients.

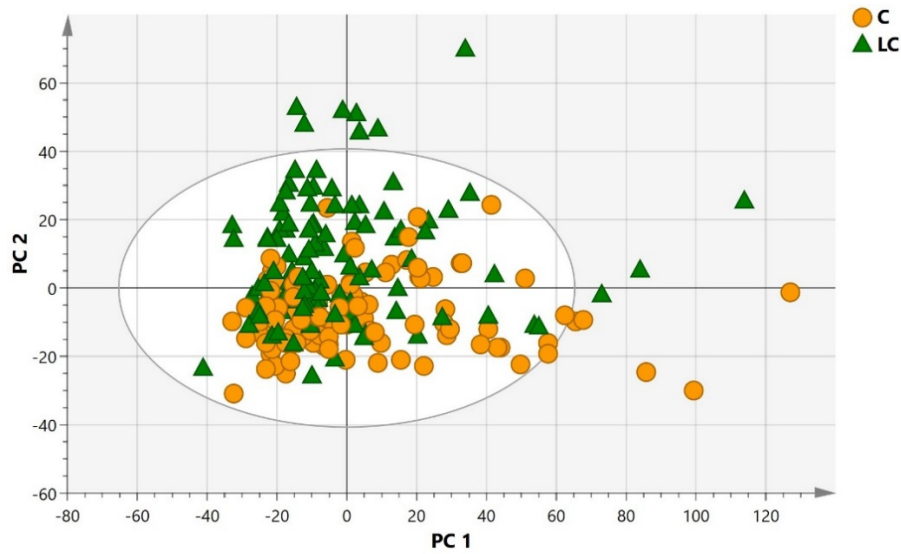

Figure S3: Principal component analysis (PCA) of all 232 subjects (using the reduced dataset of 78 variables) from the training and validation cohort showing a clustering trend for the controls and lung cancer patients. Using only the first two principal components, the PCA model shows a  $R^2$  value of 0.774 and a  $Q^2$  value of 0.749. C: controls; LC: lung cancer patients; PC: principal component.

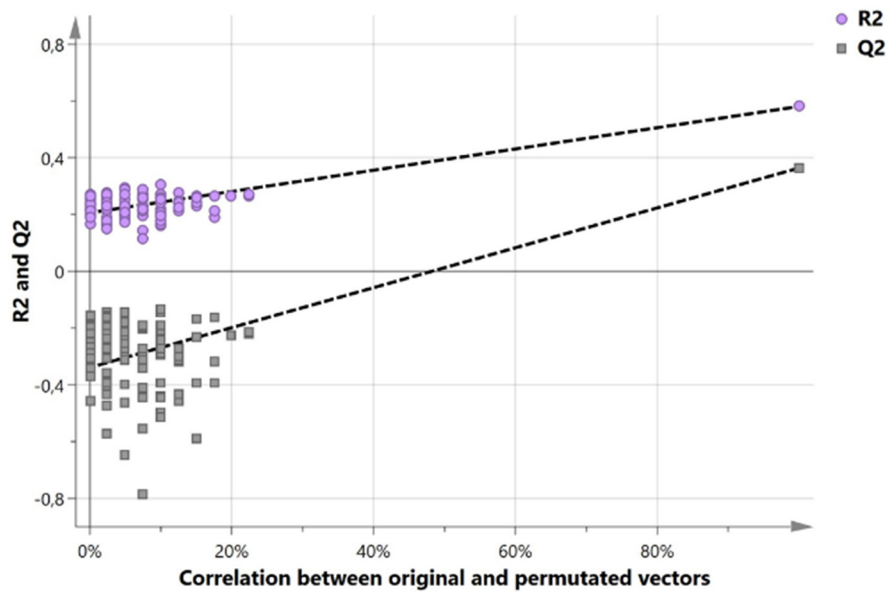

Figure S4: Permutation test of the training model using 100 permutations.
